# Supplementary material
Source: publisher figshare collection journal article supplement (https://geolsoc.figshare.com/ndownloader/files/17992895)
Supplement: Supplementary file 1 [file 17992895]

## Sheet: Hoja1
SM Table 1. Mineral chemistry	Profile garnet (rim to core)
Mineral	Garnet	Garnet	Garnet	Garnet	Garnet	Garnet	Garnet	Garnet	Garnet	Garnet	Garnet	Garnet	Garnet	Garnet	Garnet	Garnet	Garnet	Garnet	Garnet	Garnet	Garnet	Garnet	Garnet	Garnet	Garnet	Garnet	Garnet	Garnet	Garnet	Garnet	Garnet	Garnet	Garnet	Garnet	Garnet	Garnet	Garnet	Garnet	Garnet	Garnet	Garnet	Garnet	Garnet	Garnet	Garnet	Garnet	Garnet	Garnet	Garnet
Sample	Migmatite 7621	Migmatite 7621	Migmatite 7621	Migmatite 7621	Migmatite 7621	Migmatite 7621	Migmatite 7621	Migmatite 7621	Migmatite 7621	Migmatite 7621	Migmatite 7621	Migmatite 7621	Migmatite 7621	Migmatite 7621	Migmatite 7621	Migmatite 7621	Migmatite 7621	Migmatite 7621	Migmatite 7621	Migmatite 7621	Migmatite 7621	Migmatite 7621	Migmatite 7621	Migmatite 7621	Migmatite 7621	Migmatite 7621	Migmatite 7621	Migmatite 7621	Migmatite 7621	Migmatite 7621	Migmatite 7621	Migmatite 7621	Migmatite 7621	Migmatite 7621	Migmatite 7621	Migmatite 7621	Migmatite 7621	Migmatite 7621	Migmatite 7621	Migmatite 7621	Migmatite 7621	Migmatite 7621	Migmatite 7621	Migmatite 7621	Migmatite 7621	Migmatite 7621	Migmatite 7621	Migmatite 7621	Migmatite 7621
Analysis:	7621gt1prf1-1	7621gt1prf1-2	7621gt1prf1-3	7621gt1prf1-4	7621gt1prf1-5	7621gt1prf1-6	7621gt1prf1-7	7621gt1prf1-8	7621gt1prf1-9	7621gt1prf1-10	7621gt1prf1-11	7621gt1prf1-12	7621gt1prf1-13	7621gt1prf1-14	7621gt1prf1-15	7621gt1prf1-16	7621gt1prf1-17	7621gt1prf1-18	7621gt1prf1-19	7621gt1prf1-20	7621gt1prf1-21	7621gt1prf1-22	7621gt1prf1-23	7621gt1prf1-24	7621gt1prf1-25	7621gt1prf1-26	7621gt1prf1-27	7621gt1prf1-28	7621gt1prf1-29	7621gt1prf1-30	7621gt1prf1-31	7621gt1prf1-32	7621gt1prf1-33	7621gt1prf1-34	7621gt1prf1-35	7621gt1prf1-36	7621gt1prf1-37	7621gt1prf1-38	7621gt1prf1-39	7621gt1prf1-40	7621gt1prf1-41	7621gt1prf1-42	7621gt1prf1-43	7621gt1prf1-44	7621gt1prf1-45	7621gt1prf1-46	7621gt1prf1-47	7621gt1prf1-48	7621gt1prf1-49
Wt%	Selected by characterization of rim composition																																								Selected by characterization of core composition
SiO2	37.2244	37.034	36.9485	37.1667	36.9506	37.0512	37.2886	36.8607	37.2095	37.1667	37.0426	37.3721	37.0982	37.0683	37.0319	37.1645	36.8907	37.0576	36.91	36.9549	37.064	37.0512	37.3186	37.0533	37.0811	37.3186	37.4619	37.1581	36.9634	36.9549	37.0747	37.0169	36.9827	37.0255	37.3271	37.2309	37.0576	36.9827	37.4854	37.0041	37.1089	37.1389	37.2137	36.8137	37.1453	37.2244	37.3464	37.4491	37.4469
TiO2	0	0	0	0.0184	0	0	0.0017	0.005	0	0.0083	0.0033	0	0	0.0017	0.0067	0	0.0133	0.0117	0.0117	0	0.0033	0.0083	0.0133	0	0	0.0067	0	0.0017	0.01	0.0083	0.0167	0	0	0	0	0.015	0.0117	0.01	0	0.0083	0.0117	0.0017	0	0	0.0167	0.0083	0.0083	0.0067	0
Al2O3	21.2092	21.3188	21.2584	21.1393	21.2867	21.1337	21.2414	21.1242	21.196	21.0467	20.9598	21.315	21.3169	21.1941	21.2243	21.0316	21.1828	21.2659	21.0732	21.1299	21.3547	21.1526	21.1752	21.1299	21.111	21.0392	21.1714	21.2376	21.179	21.2092	21.3302	21.4813	21.4303	21.1847	21.0581	21.0996	21.3245	21.3736	21.1412	21.2338	21.0146	21.315	21.2451	21.0826	21.0845	21.1374	21.0108	21.1809	21.2168
FeO	32.3747	32.2911	32.4853	32.0041	32.5124	32.3798	31.99	32.2074	32.1817	31.7701	31.7404	32.0017	32.0672	32.3502	32.2435	31.8318	32.0723	31.9759	31.7804	31.6607	31.9875	32.3978	32.0723	32.2126	31.9488	32.2009	31.8832	31.8317	32.1688	32.1083	31.8858	31.7186	31.9372	32.52	31.9528	32.1984	31.8704	32.2782	32.0234	32.0917	31.7893	32.4108	32.0222	31.9219	32.1624	31.6285	31.6658	31.6749	32.0042
MnO	3.8441	3.6917	3.7873	3.7757	3.9254	3.8338	3.6943	3.6582	3.6517	3.6491	3.6414	3.8234	3.6349	3.8738	3.7886	3.6594	3.693	3.6685	3.7331	3.7602	3.6698	3.5962	3.7369	3.6001	3.5329	3.5923	3.5381	3.4193	3.7124	3.5639	3.4399	3.4167	3.4774	3.5407	3.3508	3.5536	3.4464	3.3934	3.2734	3.201	3.1339	3.183	3.1339	3.183	3.1158	3.0229	3.2127	3.2695	3.1171
MgO	4.3563	4.2452	4.2667	4.4293	4.5089	4.4823	4.3613	4.2568	4.3381	4.4492	4.4409	4.5188	4.3546	4.4226	4.3215	4.5851	4.2933	4.3563	4.542	4.4641	4.542	4.5487	4.5802	4.7261	4.4276	4.6697	4.5851	4.5586	4.6216	4.7675	4.6498	4.6133	4.6365	4.6017	4.6183	4.6332	4.6249	4.5271	4.7029	4.7228	4.8985	4.7991	4.8952	4.7476	4.9931	4.8704	4.9184	4.8587	4.9516
CaO	1.0312	1.0242	1.1208	1.1026	1.1082	1.0368	1.0606	1.0984	1.1236	1.0984	1.1124	1.2159	1.0228	1.097	1.1585	1.1278	1.1446	1.083	1.0298	1.0956	1.0984	1.069	1.1529	1.1166	1.1334	1.0858	1.0578	1.1096	1.1711	1.1446	1.027	1.1669	1.1879	1.1753	1.0956	1.132	1.1054	1.1334	1.2005	1.2005	1.1082	1.1418	1.0956	1.125	1.0676	1.1487	1.1473	1.132	1.0858
Sum	100.04	99.605	99.867	99.6361	100.292	99.9176	99.6379	99.2107	99.7006	99.1885	98.9408	100.247	99.4946	100.008	99.775	99.4002	99.29	99.4189	99.0802	99.0654	99.7197	99.8238	100.049	99.8386	99.2348	99.9132	99.6975	99.3166	99.8263	99.7567	99.4241	99.4137	99.652	100.048	99.4027	99.8627	99.4409	99.6984	99.8268	99.4622	99.0651	99.9903	99.6057	98.8738	99.5854	99.0406	99.3097	99.5718	99.8224
Apfu (24 oxygen)
Si	5.96117	5.95289	5.93513	5.96761	5.91403	5.94495	5.9803	5.95233	5.97096	5.9859	5.9835	5.96123	5.96116	5.94261	5.94703	5.97548	5.9493	5.96001	5.95722	5.96247	5.94267	5.94522	5.96555	5.94098	5.97266	5.97366	5.9949	5.97079	5.93119	5.92798	5.95223	5.94047	5.92972	5.93155	5.99252	5.96344	5.94997	5.93339	5.99006	5.94326	5.97286	5.93688	5.95873	5.94698	5.95484	5.98279	5.99108	5.98937	5.9777
Ti	0	0	0	0.00222206	0	0	0.000205063	0.000607274	0	0.00100541	0.000400922	0	0	0.000204982	0.000809265	0	0.00161322	0.0014153	0.00142029	0	0.000397956	0.0010017	0.00159908	0	0	0.000806644	0	0.000205456	0.00120687	0.00100139	0.00201656	0	0	0	0	0.00180708	0.00141291	0.00120669	0	0.00100264	0.00141639	0.000204395	0	0	0.00201361	0.00100333	0.00100144	0.000805947	0
Al	4.00275	4.0385	4.02433	4.00006	4.01514	3.99624	4.01476	4.02007	4.00843	3.99475	3.98998	4.00686	4.03675	4.00423	4.01687	3.98517	4.0259	4.03073	4.0083	4.01774	4.03508	4	3.98917	3.99262	4.00732	3.96894	3.99274	4.02174	4.00503	4.00949	4.03577	4.06267	4.04943	3.99963	3.98414	3.98288	4.03503	4.04122	3.98134	4.01914	3.98617	4.01555	4.00903	4.01367	3.98345	4.00366	3.97218	3.99222	3.99143
Fe (Fe Total as Fe2+)	4.33524	4.34024	4.36338	4.2969	4.35125	4.34434	4.29006	4.34893	4.3182	4.27855	4.28716	4.26839	4.30866	4.33665	4.32981	4.27966	4.32497	4.30027	4.28906	4.27148	4.28857	4.34695	4.28705	4.31876	4.30301	4.31009	4.26636	4.27703	4.31627	4.3068	4.28058	4.25635	4.28189	4.35633	4.2894	4.31252	4.27886	4.33028	4.27898	4.30994	4.27848	4.33233	4.28751	4.312	4.31139	4.25067	4.24766	4.23603	4.27197
Mn	0.521359	0.502565	0.51523	0.513432	0.53209	0.520972	0.501785	0.500299	0.496277	0.497737	0.498151	0.516508	0.494663	0.525957	0.515278	0.498303	0.504391	0.499685	0.510279	0.513812	0.498322	0.488707	0.505913	0.48886	0.481931	0.486997	0.479513	0.465323	0.504503	0.484171	0.46772	0.464372	0.472203	0.480391	0.455588	0.482059	0.468643	0.461082	0.443003	0.435411	0.427197	0.430928	0.424986	0.435474	0.423033	0.41147	0.436481	0.442854	0.421413
Mg	1.04003	1.0173	1.02176	1.06025	1.07586	1.07219	1.04277	1.02478	1.0378	1.06827	1.06942	1.07457	1.04316	1.057	1.03463	1.09905	1.0322	1.04451	1.09288	1.07377	1.08568	1.08812	1.09153	1.12969	1.06318	1.11437	1.09387	1.09203	1.10557	1.14012	1.11291	1.10372	1.10828	1.09903	1.10533	1.10637	1.10704	1.0828	1.12037	1.13084	1.17542	1.14371	1.16855	1.14337	1.19333	1.16699	1.17626	1.15847	1.17839
Ca	0.176917	0.176374	0.192878	0.189665	0.190021	0.178223	0.18223	0.190023	0.193163	0.189521	0.192503	0.207782	0.176072	0.18841	0.199316	0.194267	0.197754	0.186603	0.178063	0.189378	0.188674	0.183766	0.197442	0.191801	0.195578	0.186203	0.18135	0.191015	0.20132	0.196703	0.176642	0.200621	0.20405	0.201715	0.188434	0.19425	0.190142	0.194809	0.20552	0.206566	0.191093	0.195543	0.187942	0.194698	0.183357	0.19779	0.197176	0.193958	0.185691
Sum of cations	16.0375	16.0279	16.0527	16.0301	16.0784	16.0569	16.0121	16.037	16.0248	16.0157	16.0211	16.0353	16.0205	16.0551	16.0437	16.0319	16.0361	16.0232	16.0372	16.0287	16.0394	16.0538	16.0383	16.0627	16.0237	16.0411	16.0087	16.0181	16.0651	16.0663	16.0279	16.0282	16.0456	16.0686	16.0154	16.0433	16.0311	16.0448	16.0193	16.0462	16.0326	16.0551	16.0368	16.0462	16.0514	16.0144	16.0218	16.0137	16.0266
XFe = Fe/(Fe+Mg)	0.806516	0.810118	0.810263	0.802088	0.801761	0.802052	0.804463	0.809297	0.806236	0.800204	0.800354	0.798881	0.805083	0.804028	0.807132	0.795666	0.807323	0.804574	0.796936	0.799116	0.797985	0.799796	0.79706	0.792659	0.801874	0.794566	0.795928	0.796607	0.796089	0.790686	0.793656	0.794086	0.794388	0.798541	0.795109	0.795831	0.794455	0.799966	0.7925	0.792155	0.784481	0.791144	0.785826	0.790414	0.783217	0.784596	0.783134	0.78525	0.783796
XAlm=Fe/(Fe+Mg+Mn+Ca)	0.71379	0.719002	0.7161	0.709031	0.707609	0.710356	0.713009	0.717168	0.71429	0.709064	0.708945	0.703513	0.715421	0.709993	0.712254	0.704902	0.713772	0.71302	0.706567	0.706211	0.70754	0.711734	0.704883	0.704631	0.711983	0.706844	0.708569	0.709833	0.70439	0.702831	0.708957	0.706441	0.705834	0.709793	0.710312	0.707528	0.707871	0.713511	0.707519	0.708551	0.704602	0.709926	0.706462	0.708565	0.7055	0.705281	0.701214	0.702339	0.705241
XSps=Mn/(Fe+Mg+Mn+Ca)	0.085841	0.0832546	0.0845576	0.0847213	0.0865296	0.0851856	0.0833967	0.0825027	0.0820911	0.0824876	0.0823766	0.0851304	0.082135	0.0861092	0.0847632	0.0820754	0.0832422	0.0828519	0.0840619	0.0849495	0.0822145	0.0800169	0.0831829	0.0797603	0.079741	0.0798662	0.079639	0.0772269	0.082332	0.0790123	0.0774647	0.0770734	0.0778387	0.0782718	0.075444	0.0790884	0.0775297	0.0759736	0.0732495	0.0715812	0.0703531	0.0706149	0.0700259	0.0715588	0.0692236	0.0682721	0.0720553	0.0734258	0.0695692
XGro=Ca/(Fe+Mg+Mn+Ca)	0.029129	0.029218	0.0316544	0.0312965	0.0309017	0.0291417	0.0302867	0.031336	0.0319518	0.0314085	0.0318332	0.0342465	0.0292355	0.0308462	0.0327874	0.0319977	0.0326363	0.0309404	0.0293336	0.0313101	0.0311279	0.0300884	0.0324636	0.0312934	0.0323606	0.0305368	0.0301191	0.0317016	0.0328542	0.0321001	0.0292558	0.0332977	0.033636	0.0328661	0.0312041	0.0318694	0.0314561	0.0320992	0.0339822	0.0339593	0.0314702	0.032043	0.0309677	0.0319935	0.0300038	0.0328178	0.0325504	0.0321586	0.0306548
Xpy=Mg/(Fe+Mg+Mn+Ca)	0.171239	0.168526	0.167688	0.174951	0.174959	0.175317	0.173308	0.168993	0.171667	0.17704	0.176845	0.17711	0.173209	0.173052	0.170196	0.181025	0.17035	0.173188	0.180038	0.177529	0.179118	0.17816	0.17947	0.184315	0.175916	0.182753	0.181673	0.181238	0.180423	0.186057	0.184323	0.183187	0.182691	0.179069	0.183039	0.181515	0.183143	0.178416	0.18525	0.185908	0.193574	0.187416	0.192544	0.187883	0.195272	0.193629	0.194181	0.192076	0.194535
[truncated: 175 more columns]
